# Supplementary material
Source: publisher figshare collection journal article supplement (https://diabetesjournals.figshare.com/articles/dataset/_/20383599)
Supplement: Supplementary file 1 [file 1]

A listing of the states of India with participating principal investigators (PI), co- investigators (co-I) ordered alphabetically state-wise is given below:

## LIST OF ICMR-INDIAB INVESTIGATORS

**ICMR-INDIAB Project National Coordinators**, Investigators and Key Staff: Project Coordination (Madras Diabetes Research Foundation, Chennai, India): Dr. Viswanathan Mohan (National study Coordinator & Principal Investigator); Dr. Ranjit Mohan Anjana, Dr. Ranjit Unnikrishnan, Dr. Rajendra Pradeepa, Dr. Mohan Deepa, Ms. Vasudevan Sudha (National Co-Principal Investigator); Mr. Elangovan Nirmal (Project Coordinator); Ms. Radhakrishnan Subashini, Mr. Ulagamathesan Venkatesan (Biostatistician).

### ICMR-INDIAB Expert Group

Dr.L.M.Nath (Consultant in Community Medicine, New Delhi, India), Dr.R.C.Mahajan (Post-Graduate Institute Medical Research, Chandigarh, India), Mr. K.Ramachandran (Department of Biostatistics, All India Institute of Medical Sciences, New Delhi, India), Dr.M.D.Gupte (National Institute of Epidemiology, Chennai, India), Dr.R.Lakshmy (All India Institute of Medical Sciences, New Delhi, India), Dr.Jagadish Mahanta (Regional Medical Research Centre, Dibrugarh, India), Dr.KanwarNarain (Regional Medical Research Centre, Dibrugarh, India), Dr.Sri Venkata Madhu (University College of Medical Sciences and GTB Hospital, New Delhi, India), Dr.Ashok Kumar Das (Pondicherry Institute of Medical Sciences, Puducherry, India), Dr.Arvind Pandey (Indian Council of Medical Research (ICMR), New Delhi, India), Dr.Nikhil Tandon (All India Institute of Medical Sciences, New Delhi, India), Dr.R.S.Dhaliwal (Indian Council of Medical Research (ICMR), New Delhi, India), Dr.Tanvir Kaur (Indian Council of Medical Research (ICMR), New Delhi, India) and Dr.Balram Bhargava (Indian Council of Medical Research (ICMR), New Delhi, India).

### ICMR-INDIAB state Principal Investigators and Co-Investigators (in alphabetical order):

**Andhra Pradesh** (n= 630): Dr. P.V. Rao, Nizam's Institute of Medical sciences, Hyderabad (state PI), Dr. Modugu Nageswara Rao (state Co-I); **Arunachal Pradesh** (n= 662): Dr. Lobsang Jampa, Directorate of Health Services, Naharlagun, Govt. of Arunachal Pradesh (state PI), Dr.T.Kaki (state Co-I); **Assam** (n= 682): Dr.H.K.Das, Regional Medical Research Centre, Dibrugarh (state PI), Dr.P.K.Borah (state Co-I); **Bihar** (n= 559): Dr.Ajay Kumar, Diabetes Care & Research Centre, Kankerbagh, Patna (state PI), Dr.Smita Sharma (state Co-I); **Chandigarh** (n= 505): Dr.Anil Bhansali, Post Graduate Institute of Medical Education & Research, Chandigarh (state PI); **Chhattisgarh** (n= 552): Dr.Kalpna Dash, Apollo Hospitals, Bilaspur (state PI), Dr.Vijay Kumar Shrivastava (state Co-I); **Delhi** (n= 616): Dr.Nikhil Tandon, All India Institute of Medical Sciences, New Delhi (State PI), Dr. Anand Krishnan (State Co-I); **Goa** (n= 628): Dr.Ankush Desai, Goa Medical College, Bambolim (State PI), Dr.Amit Dias (State Co-I); **Gujarat** (n= 634): Dr.Banshi Saboo, DIACARE, Ahmedabad (state PI), Dr.Jayendrasinh M.Padhiyar (state Co-I); **Haryana** (n= 675): Dr.Sanjay Kalra, Bharti hospital, Karnal (state PI), Dr.Bharti Kalra (State Co-I); **Himachal Pradesh** (n=603): Dr.Jatinder Kumar Moktha, Indira Gandhi Medical College, Shimla (state PI), Dr.Ramesh Gulepa (state Co-I); **Jharkhand** (n= 520): Dr.V.K.Dhandhaniah, Diabetes Care Centre, Ranchi (state PI); **Karnataka** (n= 723): Dr.Prabha Adhikari, Kasturba Medical College, Mangalore (state PI), Dr.B.Sathish Rao (state Co-I); **Kerala** (n= 584): Dr.P.K.Jabbar, Government Medical College, Trivandrum (state PI), Dr.C.Jayakumari (state Co-I); **Madhya Pradesh** (n= 673): Dr.Sunil M.Jain, TOTAL Diabetes Thyroid Hormone Research Institute Pvt Ltd. Indore (state PI), Dr.Gaurav Gupta (state Co-I); **Maharashtra** (n= 468): Dr.Shashank Joshi, Lilavati Hospital and Research Centre, Department of Diabetology and Endocrinology Mumbai, Maharashtra, Dr.Chittaranjan Yajnik, KEM Hospital, Pune & Dr.Prashant P.Joshi, Government Medical College, Nagpur (state PI); **Manipur** (n=688): Dr.Somorjit Ningombam, Loklaobung, Moirangkhom, Imphal (state PI), Dr.Th.Bhubhonchandra Singh (state Co-I); **Meghalaya** (n=623): Dr.R.O.Budnah, Office of the Director of Health Services (DHS), Shillong (state PI), Dr.M.R.Basaiaiwmoit (state Co-I); **Mizoram**

(n=594): Dr.Rosangluaia, Civil Hospital, Aizawl (state PI), Dr.P.C.Lalramenga (state Co-I); **Nagaland** (n=550): Dr.VizolieSuokhrie, Directorate of Health & Family Welfare, Govt. of Nagaland, Kohima (state PI), Dr.SaoTunyi (state Co-I); **Odisha** (n= 505): Dr.Saroj Kumar Tripathy, S.C.B Medical College & Hospital, Cuttack (state PI), Dr.Nirmal Chandra Sahu (state Co-I); **Puducherry**(n= 625): Dr.Anil J. Purty, Pondicherry Institute of Medical Sciences (PIMS), Kalapet (state PI), Dr.Ashok Kumar Das (state Co-I); **Punjab** (n= 615): Dr.Anil Bhansali, Post Graduate Institute of Medical Education & Research, Chandigarh (state PI), Dr.Mary John (state Co-I); **Rajasthan**(n= 700): Dr.Arvind Gupta, Jaipur Diabetes Research Centre, Jaipur (state PI), Dr.B.Lal Gupta &Dr.Sandeep K Shrivastava (state Co-Is); **Sikkim** (n= 461): Dr.Karma Jigme Tobgay, Dept. of Healthcare, Human Services & Family Welfare, Govt. of Sikkim, Gangtok (state PI), Dr.TempoTsewangKaleon (state Co-I); **TamilNadu** (n= 636): Dr. Viswanathan Mohan, Madras Diabetes Research Foundation, Chennai (National Co-ordinator& state PI), Dr.Ranjit Mohan Anjana, Dr.RajendraPradeepa, Dr.Mohan Deepa &Ms.Vasudevan Sudha (state Co-Is); **Tripura** (n= 673): Dr.TarangaReang, Government Medical College, Agartala (state PI), Dr.Swapan Kumar Das (State Co-I); **Uttar Pradesh** (n= 606): Dr.Sarita Bajaj, MLN Medical College, Prayagraj (state PI), Dr.Manoj Kumar Mathur (state Co-I); **Uttarakhand**(n= 639): Dr.Sagar Modi, Himalayan Institute of Medical Sciences, Dehradun (state PI), Dr.RakeshKakkar (state Co-I); **West Bengal** (n= 461): Dr.Subhankar Chowdhury, Institute of Post Graduate Medical Education & Research (IPGMER) & SSKM Hospital, Kolkata (state PI), Dr.Sujoy Ghosh (state Co-I).
